# Supplementary material
Source: PubMed Central journal article supplement (PMC5815882)
Supplement: NIHMS928011-supplement-1.pdf [file NIHMS928011-supplement-1.pdf]

## **Comprehensive mutation and copy number profiling in archived circulating breast cancer tumor cells reveals heterogeneous resistance mechanisms**

Costanza Paoletti, Andi K. Cani, Jose M. Larios, Daniel H. Hovelson, Kimberly Aung, Elizabeth P. Darga, Emily M. Cannell, Paul J. Baratta, Chia-Jen Liu, David Chu, Maryam Yazdani, Allen R. Blevins, Valeria Sero, Nahomi Tokudome, Dafydd G. Thomas, Christina Gersch, Anne F. Schott, Yi-Mi Wu, Robert Lonigro, Dan R. Robinson, Arul M. Chinnaiyan, Farideh Z. Bischoff, Michael D. Johnson, Ben H. Park, Daniel F. Hayes, James M. Rae, Scott A. Tomlins

### **SUPPLEMENTARY MATERIALS**

|                                            | <b>Page</b> |
|--------------------------------------------|-------------|
| <b>Supplementary Materials and Methods</b> | <b>1</b>    |
| <b>Supplementary Figure Legends</b>        | <b>14</b>   |
| <b>Supplementary Table Legends</b>         | <b>16</b>   |
| <b>Supplementary References</b>            | <b>17</b>   |
| <b>Supplementary Figures and Tables</b>    | <b>19</b>   |

### **Supplementary Materials and Methods**

#### **Preclinical evaluation of cultured breast cancer cells spiked into normal human blood**

Cultured human breast cancer cell line BT-474 was obtained from the laboratory of Dr. Stephen Ethier and routinely maintained in DMEM +10% FBS at 37°C in 5% CO<sub>2</sub>. The identity of the cells was confirmed by standard Short Tandem Repeat profiling (February 2011). BT-474

( $n=300$ ) were freshly harvested and spiked into pooled de-identified healthy human whole blood (WB) collected in a CellSave Preservative tube (Janssen Diagnostics, LLC). Tumor cell isolation and enumeration was performed using the CellSearch<sup>®</sup> system with the CellSearch<sup>®</sup> CXC kit, as previously described (1). The elapsed time between CTC enrichment and purification varied from 2 years (cartridges were stored at RT), 6 months (cartridge stored at 4°C), and 3 days (cartridge stored at 4°C). This evaluation was also performed to see the effects of long term storage on the quality of the cells. As described below for patient specimens, BT-474 cells were flushed from the CellSearch<sup>®</sup> cartridges and purified using DEPArray<sup>™</sup> technology. Isolated single or groups of CTC were subjected to whole genome amplification (WGA) before sequencing analysis.

### **Patient population**

Twenty-eight eligible patients with MBC, who were enrolled in the MI-ONCOSEQ protocol at the University of Michigan Comprehensive Cancer Center (2), signed a separate informed consent approved by the University of Michigan IRB to be enrolled in a companion protocol designated Mi-CTC-ONCOSEQ that allowed blood collection for cfDNA (data partially reported elsewhere) (3) and CTC analyses. All patients enrolled into this study had WES performed on their metastatic research tissue biopsy using the Illumina HiSeq 2500 platform. Thirteen of these 24 patients who had  $\geq 5$  CTC/7.5 ml WB by CellSearch<sup>®</sup> enumeration, and who had at least one DEPArray<sup>™</sup>-purified CTC with high quality DNA determined by the Ampli1<sup>™</sup> quality control (QC) kit (as described in methods below), were enrolled in the present study.

Blood specimens were collected into fixative containing 10 ml vacutainer tubes (CellSave) and processed within 96 hours. These specimens were collected from a range of 7 days prior, to 344 days after the research biopsy. For two patients (#4, who had  $<5$  CTC/7.5 ml at time of enrollment and #24, who had  $\geq 5/7.5$  ml CTC at time of enrollment), blood for CTC-DNA was also collected at the time of disease progression after 690 days and 465 days from the baseline samples, respectively.

### **CTC enrichment and enumeration**

CTC were enriched from WB using ferrofluid particles coated with EpCAM antibody and enumerated using the CellSearch<sup>®</sup> System, according to manufacturer's instructions (Janssen Diagnostics, LLC Raritan, NJ, United States), and as previously described (1). Briefly, cells were stained with anti-cytokeratin (CK) 8, 18, and 19- Fluorescein isothiocyanate (FITC) labeled antibodies, the nuclear dye 4',6'-diamino-2-phenylindole (DAPI), and CD45 antibody labeled with allophycocyanin (APC). CTC were defined by visual inspection as CK positive/DAPI positive/CD45 negative. After processing, CellSearch<sup>®</sup> cartridges were stored protected from light at 4°C for an average of 322 days (range 37-827 days) before CTC purification (**Supplementary Table S3**).

### **Cell Purification**

Because CellSearch<sup>®</sup> technology enriches, but does not purify CTC from WBC, each CellSearch<sup>®</sup> cartridge was subsequently processed to recover single and pooled populations of pure CTC using the DEPArray<sup>™</sup> system (Di-Electro-Phoretic Array; Menarini Silicon Biosystems, S.p.A., Bologna, Italy) according to the manufacturer's instructions. After the cells

were flushed from the cartridges using the manipulation buffer wash provided by the manufacturer, the cell pellet was re-suspended and placed into the DEPArray™ 300k chip which contains electronically controlled electrodes used to generate the electrophoretic cages. The DEPArray™ single cell sorting system separates individual cells into separate virtual magnetic nests/cages, based on immunofluorescent staining criteria and cell morphology (CTC: CK-FITC positive, DAPI positive, and CD45-APC negative; WBC: CK-FITC negative, DAPI positive, and CD45-APC positive). After imaging of the cell within each virtual magnetic nest/cage generated by DEPArray™, individual cells of interest were routed for isolation and recovery into 0.2 ml tubes (4).

### **CTC whole genome amplification and WGA quality control**

DNA from individual CTC or WBC from the same specimen, was isolated and subjected to whole genomic amplification (WGA) using *Ampli1*™ WGA kit (Menarini Silicon Biosystems, S.p.A.) which includes digestion with a restriction enzyme (MseI) according to the manufacturer's instructions (5). Subsequent DNA quality control was performed using *Ampli1*™ QC kit as described by Polzer *et al* (5). Only cells with high quality DNA were further investigated for down-stream sequence analysis. Normal control DNA derived from matched WBC was processed and tested for QC following the same process and criteria.

### **CTC Genomic profiling and data analysis**

Targeted next-generation sequencing (NGS) was performed essentially as previously described (6-8). Briefly, 20 ng of WGA DNA (quantified with the Qubit Fluorometer 3.0, ThermoFisher,

Waltham, MA) for each single, or equally pooled CTC, or WBC DNA was used for targeted, multiplexed PCR-based NGS (Ampliseq, Ion Torrent). Libraries with barcode incorporation were constructed using the DNA component of the OncoPrint Comprehensive Assay (OCA), a panel comprised of 2,531 amplicons targeting 130 genes covering 260,717 bases (ThermoFisher, Waltham, MA). Genes were selected based on pan-solid tumor NGS and copy number profiling data analysis that prioritized somatic, recurrently altered oncogenes, tumor suppressor genes, genes present in high level copy gains/losses and known/investigational therapeutic targets (7). Libraries for spiked BT-474 cells were constructed using the Cancer Hotspot v2 Assay (CHPv2), a panel comprised of 207 amplicons targeting regions containing recurrent alterations in 50 onco- and tumor suppressor genes (ThermoFisher, Waltham, MA). Because the WGA method we used digests the DNA with the MseI restriction enzyme, some amplicons in each panel were adversely affected based on the presence of the MseI restriction site (for OCA see **Supplementary Table S1**; for CHPv2, as previously described (9)). Library preparation, template, and sequencing using the Ion Torrent Proton were performed according to the manufacturer's instructions. Data analysis was performed using Torrent Suite 4.0.2 – 5.0.2, with alignment by TMAP using default parameters, and variant calling with the Ion Torrent Variant Caller plugin (version v4.0-r76860 – v5.0.2.1) using default low-stringency somatic variant settings. Variant annotation, filtering and prioritization was performed essentially as previously described using validated in-house pipelines (6-8). Briefly, called variants were filtered to remove synonymous or non-coding variants, those with flow corrected read depths (FDP) less than 10, flow corrected variant allele containing reads (FAO) less than 10, variant allele frequencies (FAO/FDP) less than 0.10, extreme skewing of forward/reverse flow corrected reads calling the variant (FSAF/FSAR <0.2 or >5), or indels within homopolymer runs >4. Called

variants were filtered using a panel-specific, in house blacklist. Variants reported at population allele frequencies  $>0.5\%$  in ESP6500 or 1000 Genomes or those reported in ESP6500 or 1000 Genomes at population allele frequencies  $<0.5\%$  but with observed variant read frequencies  $>0.40$  and  $<0.60$  or  $>0.9$  were considered germ line variants unless occurring at a known cancer hot-spot. Variants located at the last mapped base (or outside) of amplicon target regions, those with the majority of supporting reads harboring additional mismatches or indels (likely sequencing error), those in repeat-rich regions (likely mapping artifacts), and those occurring exclusively in one amplicon if overlapping amplicons cover the variant were excluded. High confidence somatic variants passing the above criteria were then visually confirmed in Integrated Genome Viewer (IGV) as were the same regions in samples from the same patient where the variant was not called to confirm both coverage and absence of the variant. We have previously confirmed that these filtering criteria identify variants that pass Sanger Sequencing validation with  $>95\%$  accuracy (6,8,10). We prioritized potential driving alterations using the OncoPrint annotation in the OncoPrint Knowledge Base, which uses pan-cancer NGS data to identify genes as oncogenes or tumor suppressors, based on overrepresentation of hot-spot or deleterious mutations, respectively. Variants in oncogenes are then considered gain-of-function (GoF) if at a hot-spot, and variants in tumor suppressors are considered loss-of-function (LoF) if deleterious or at a hot-spot (6,7,10).

Copy number analysis from total amplicon read counts provided by the coverageAnalysis plugin (version v4.4.2.2 - v5.0.2.0) was performed essentially as previously described using a validated approach (6-8,11) with adaptations for single cell sequencing. Specifically, for copy number analysis, we retained only well-performing amplicons (with  $>100$  reads in all individual or pooled WBC samples, 795 total amplicons) in order to exclude amplicons lost due to their

containing the MseI restriction site. To identify CNAs, normalized read counts per amplicon for each sample were divided by the normalized mean read count of the corresponding amplicons from the WBC samples, yielding a copy-number ratio for each amplicon. Gene-level copy-number estimates were determined by taking the coverage-weighted mean of the per amplicon ratios, with expected error determined by the amplicon-to-amplicon variance (11). Genes with a  $\log_2$  copy-number estimate  $< -2$  or  $> 2$  were considered to have high-level loss or gain, respectively.

### **Confirmation of ESR1, CDH1 and BRCA2 mutations by Sanger Sequencing**

Bidirectional Sanger Sequencing to validate patient #2 *CDH1* (p.Q641X) and *ESR1* (p.Y537S, p.D538G, p.A569S) and patient #17 *BRCA2* (p.Q1931X) somatic variants was performed on selected samples. WGA CTC/WBC Genomic DNA (10 ng) was used as template in PCR amplifications with Invitrogen Platinum PCR Supermix Hi-Fi (ThermoFisher, Waltham, MA) with the suggested denaturation and cycling conditions. Primer sequences were designed with the PrimerQuest tool from IDT (Coralville, IA) (*CDH1* Q641 forward: CAGACCTTCCTCCCAATACATC, reverse: AAGGGAAGCATGGCAGTT; *ESR1* Y537/D538 forward: CTTTCTGTGTCTTCCCACCTAC, reverse: TTTGGTCCGTCTCCTCCA; *ESR1* A569 forward: CTGCTGGAGATGCTGGAC, reverse: AGGGAAACCCTCTGCCT; *BRCA2* Q1931 forward: TTGTTACGAGGCATTGGATGA, reverse: ACTGACTTATGAAGCTTCCCTATAC) (**Supplementary Table S8**). PCR products were subjected to bidirectional Sanger Sequencing by the University of Michigan DNA Sequencing Core after purification with the QIAquick PCR Purification Kit (Qiagen, Hilden, Germany) and

sequencing traces were analyzed using SeqMan Pro software (DNASTAR) and visually inspected.

## **Tissue Analysis**

### ***Specimen collection and processing***

Sequencing of clinical samples was performed under IRB-approved studies at the University of Michigan. Patients were enrolled and consented for integrative tumor sequencing in MI-ONCOSEQ Protocol, HUM00046018, as previously described (12). Needle biopsies were snap frozen in Optimal Cutting Temperature compound, and a longitudinal section was cut. Frozen sections stained with hematoxylin and eosin were reviewed by pathologists to identify cores with the highest tumor content. Remaining portions of each needle biopsy core were retained for nucleic acid extraction.

### ***DNA extraction and library preparation for exome sequencing.***

Genomic DNA from frozen needle biopsies was isolated using the Qiagen DNeasy Blood and Tissue kit, according to the manufacturer's instructions. Exome libraries of matched tumor/normal paired DNA were generated using the Illumina TruSeq DNA Sample Prep kit, per manufacturer's instructions as previously described (12). Briefly, 1–3 µg of DNA was sheared to a 250 bp peak target size, and end repaired followed by A-base addition and ligation of Illumina indexed adaptors. Agarose gel purified 300–350 bp fragments were amplified using Illumina index primers for eight cycles and purified. One µg of library was hybridized to the Agilent SureSelect Human All Exon v4 chip (Agilent Technologies) and hybridized exon fragments were captured and amplified with the Illumina index primers for nine additional PCR cycles. Purified



PCR products were analyzed for quality and quantity with the Agilent 2100 Bioanalyzer (DNA 1000 kit).

WES was performed on Illumina HiSeq 2000 or HiSeq 2500 (paired-end). Sequencing quality was assessed with FastQC. For each sequencing lane, we examined per-base quality scores across the length of the reads with lanes deemed passing if the per-base quality is  $>Q20$  in  $>85\%$  of the reads for bases 1–100. We also assessed alignment quality (Picard package) by monitoring duplication rates and potential chimeric reads from ligation artifacts.

### ***Tissue mutation analysis.***

Analysis was performed as previously described (12). Briefly, FASTQ converted sequence files were processed through an in-house pipeline for WES analyses of paired cancer and normal genomes. Sequencing reads were aligned to reference genome hg19 with Novoalign multithreaded (v2.08.02, Novocraft) and converted into BAM files using SAMtools (v0.1.18) (13). Mutation analysis was performed using VarScan2 (v2.3.2) (14) with the pileup files created by SAMtools mpileup for tumor and matched normal samples, simultaneously performing pairwise comparisons of base call and normalized sequence depth at each position. For SNV detection, filtering parameters including coverage, variant read support, variant frequency, P value, base quality, the presence of homopolymers and strandedness were applied. For indel analysis, Pindel (v0.2.4) was used and indels common to both tumor and matched normal samples were classified as germline, whereas indels present in tumor but not in normal samples were classified as somatic. Finally, a list of candidate indels and somatic mutations was generated by excluding synonymous SNVs. Detected variants were functionally annotated with ANNOVAR (15).

Tumor content for each tumor exome library was estimated from the sequence data by fitting a binomial mixture model with two components to the set of most likely SNV candidates from two-copy genomic regions as determined by copy number analysis, as previously described (12). Copy number aberrations were quantified for each gene as the segmented, normalized, GC content-corrected, log<sub>2</sub>-transformed exon coverage ratio between each tumor sample and its matched normal sample (16).

### **ddPCR analysis of tissue and cfDNA**

#### ***DNA extraction from FFPE blocks***

Formalin fixed paraffin embedded (FFPE) blocks and slides were obtained from University of Michigan Department of Pathology archives. A representative block from each specimen was chosen and DNA extracted using a commercial kit (Qiagen QiAMP FFPE tissue kit) according to the manufacturer's instructions.

#### ***Isolation of cfDNA for ddPCR***

Blood sample and plasma preparation were performed as previously described (17). Blood was collected in DNA BC tube (Streck) and centrifuged within 7 days. Plasma was obtained by a double-spin centrifuge protocol of whole blood to remove cellular concomitants and DNA was extracted using the Qiagen Circulating Nucleic Acid Kit (Qiagen) per the manufacture's protocol as previously described (3).

#### ***ddPCR for FFPE DNA and cfDNA***

Genomic and plasma DNA samples were subjected to short cycle PCR amplification for the *ESR1* p.Y537S/p.D538G and p.A569S locus with the primers shown in **Supplementary**

**Table S8.** Amplified DNA was purified using the QIAquick PCR Purification kit (Qiagen). The Bio-Rad QX200 platform was then used for ddPCR per the manufacturer's protocols with the ddPCR primers and probes listed in **Supplementary Table S8**. The results are reported as fractional abundance of mutant DNA alleles to total (mutant plus wild-type) DNA alleles for each sample assayed.

### **Functional analysis of novel *ESR1* mutation**

#### ***Steroids and drugs***

17 $\beta$ -estradiol, tamoxifen, fulvestrant, polybrene and caffeine were obtained from Sigma Aldrich. 4-hydroxytamoxifen and endoxifen were obtained from Toronto Research Chemical.

#### ***Plasmids and mutagenesis***

The lentiviral vector for wild-type *ESR1* coding sequence, pCDH-ESR1, was obtained from stock used in (12). The viral packaging plasmids psPAX2 and pMD2.G were gifts from Didier Trono (Addgene plasmids # 12260 and 12259, respectively). The previously constructed plasmid pCDH-ESR1 was mutated with Quick Change Lightning Kit (Agilent Technologies). The alanine residue at position 569 of ER was mutated to a serine residue according the manufacturer's protocol. The sequences for the sense and anti-sense primers for site-directed mutagenesis were as follows, sense: 5'-GAGCCCGCA GTGGACAAGTGGCTTTGG-3'; anti-sense: 5'-CCAAAGCCACTTGTCCACTGCGGGCTC-3' (the underlined nucleotides are mutated). Mutagenesis was confirmed by Sanger Sequencing.

### ***Cell Culture***

MCF-7 and 293T cells were obtained from the Lombardi Comprehensive Cancer Center and routinely maintained in DMEM (ThermoFisher) supplemented with 5% fetal bovine serum (Valley Biomedical). Lentivirus containing the p.A569S *ESR1* transgene was packaged in 293T cells. 293T cells were plated at a density of  $2 \times 10^6$  cells/10 cm dish. 24 hours after plating, cells were transfected with 8ug of pCDH-*ESR1*-A569S plasmid, 5ug psPAX2 and 2ug pMD2.G plasmids via calcium chloride. Transfection medium was allowed to remain on the cells for 8 hours and then replaced with fresh DMEM/5% FBS medium and cells were incubated overnight. On the following day, 12 ml of DMEM/5% FBS supplemented with 0.5mM caffeine was added to the dish for virus production. 48 hours later, the supernatant was carefully removed from the dish, filtered through a 0.45 um filter and frozen down in 1 ml aliquots.

MCF-7 cells were seeded into a 6-well plate at a density of  $0.25 \times 10^6$  cells per well and allowed to attach overnight. 24 hours after plating, cells were virally transduced with 1ml of viral supernatant supplemented with 4ug/ml polybrene for 8 hours and then restored in fresh DMEM/5% FBS. 48 hours after viral transduction, cells were stably selected in DMEM/5% FBS medium supplemented with 1ug/ml puromycin for one week. p.A569S *ESR1* transgene expression was confirmed by Sanger Sequencing of genomic DNA and cDNA reverse transcribed from 1ug of DNase-treated total RNA. For growth assays in defined hormone conditions, cells were depleted of exogenous steroids as previously described (18). Steroid-depleted parental and *ESR1* p.A569S MCF-7 cells were seeded into 96-well plates at a density of 1,000 cells/well in 0.1 ml and allowed to attach overnight. Cells were treated with  $17\beta$ -estradiol (Sigma Aldrich) or ethanol control alone or in combination with tamoxifen, 4-hydroxytamoxifen,

endoxifen or fulvestrant. Cell number was assessed by crystal violet stain five days after hormone treatment as previously published (18).

## **Supplementary Figure Legends**

**Supplementary Figure S1. Clinical timelines.** Clinical timelines and treatment from first diagnosis until enrollment into MI-CTC-ONCOSEQ for the 11 metastatic breast cancer patients (No available timeline for patient #14). Each bar represents the timeframe of treatment. Colors represent different therapies: Surgery=■; RT=■; NED= ; Tamoxifen=■; Letrozole =■; Anastrozole=■; Exemestane=■; Fulvestrant =■; Therapy other than chemo-or endocrine-therapy =■; chemotherapy =■; oophorectomy = ■; Estrace = ■; Everolimus = \*; Palbociclib = #.

**Supplementary Figure S2. Sanger sequencing of WGA CTC DNA was fully concordant with sequencing data. A.** Sanger sequencing of for CDH1 (Q641X), ESR1 (Y537S, D538G, A569S) and BRCA2 (Q1931X). NGS variant fraction (V.F.) shown when performed. Codon of affected aminoacid is underlined. Red rectangles denote Pt #2 single CTC with novel ESR1 mutation and Pt #17 single CTC with BRCA2 mutation. Only forward Sanger traces are shown, reverse traces were all in concordance (not shown); **B.** Sanger sequencing results of cDNA from parental and A569S over-expressing MCF-7 cells; **C.** Western blot confirming the presence of A569S mutation in overexpressed cells compared to Wild Type.

**Supplementary Figure S3. MCF-7 (ESR1 A569S) are not estrogen independent over 5 days in hormone-free conditions when assessed by crystal violet assay.** Cells were depleted of exogenous steroids and treated with 17 $\beta$ -estradiol or ethanol control in triplicates. Cell number was assessed by crystal violet stain five days after treatment.

**Supplementary Figure S4. The tamoxifen metabolites 4-hydroxytamoxifen and endoxifen have no increased agonistic effect in MCF-7 cells over-expressing ER-A569S.**

**Supplementary Figure S5. Inhibition of estradiol-stimulated MCF-7 parental or A569S-overexpressing cells.** Cells were withdrawn from estrogen and treated with 50pM estradiol in combination with increasing concentrations of **A.** tamoxifen, **B.** 4-hydroxytamoxifen, **C.** endoxifen or **D.** fulvestrant, in triplicates. Cell growth was assessed six days after treatment by crystal violet staining and plotted as %-growth vs. vehicle control.

**Supplementary Table Legends**

**Supplementary Table S1. Oncomine Comprehensive Panel (OCP) target genes by presence of the MseI restriction site**

**Supplementary Table S2. NGS of BT-474 cells spiked into blood and purified identifies expected *TP53* mutation**

**Supplementary Table S3. Results of CTC purification by DEPArray**

**Supplementary Table S4: Mean CTC Next Generation Sequencing parameters**

**Supplementary Table S5. NGS-identified prioritized mutations in individual and pooled CTC samples**

**Supplementary Table S6. 2 x 2 contingency tables of concordance for alterations in CTC vs tissue**

**Supplementary Table S7. Patient #2 analysis of primary, clinical metastatic tissue, research biopsy, pt-DNA by ddPCR**

**Supplementary Table S8. Primer/probe sequences used in Sanger sequencing and ddPCR**



### **Supplementary References**

1. Paoletti C, Muniz MC, Thomas DG, Griffith KA, Kidwell KM, Tokudome N, et al. Development of circulating tumor cell-endocrine therapy index in patients with hormone receptor-positive breast cancer. *Clin Cancer Res* 2015;21(11):2487-98.
2. Roychowdhury S, Iyer MK, Robinson DR, Lonigro RJ, Wu YM, Cao X, et al. Personalized oncology through integrative high-throughput sequencing: a pilot study. *Sci Transl Med* 2011;3(111):111ra21.
3. Chu D, Paoletti C, Gersch C, VanDenBerg DA, Zabransky DJ, Cochran RL, et al. ESR1 Mutations in Circulating Plasma Tumor DNA from Metastatic Breast Cancer Patients. *Clin Cancer Res* 2016;22(4):993-9.
4. Peeters DJ, De Laere B, Van den Eynden GG, Van Laere SJ, Rothe F, Ignatiadis M, et al. Semiautomated isolation and molecular characterisation of single or highly purified tumour cells from CellSearch enriched blood samples using dielectrophoretic cell sorting. *Br J Cancer* 2013;108(6):1358-67.
5. Polzer B, Medoro G, Pasch S, Fontana F, Zorzino L, Pestka A, et al. Molecular profiling of single circulating tumor cells with diagnostic intention. *EMBO Mol Med* 2014;6(11):1371-86.
6. Cani AK, Hovelson DH, McDaniel AS, Sadis S, Haller MJ, Yadati V, et al. Next-Gen Sequencing Exposes Frequent MED12 Mutations and Actionable Therapeutic Targets in Phyllodes Tumors. *Mol Cancer Res* 2015;13(4):613-9.
7. Hovelson DH, McDaniel AS, Cani AK, Johnson B, Rhodes K, Williams PD, et al. Development and validation of a scalable next-generation sequencing system for assessing relevant somatic variants in solid tumors. *Neoplasia* 2015;17(4):385-99.
8. Warrick JI, Hovelson DH, Amin A, Liu CJ, Cani AK, McDaniel AS, et al. Tumor evolution and progression in multifocal and paired non-invasive/invasive urothelial carcinoma. *Virchows Arch* 2015;466(3):297-311.
9. Salvianti F, Rotunno G, Galardi F, De Luca F, Pestrin M, Vannucchi AM, et al. Feasibility of a workflow for the molecular characterization of single cells by next generation sequencing. *Biomol Detect Quantif* 2015;5:23-9.
10. McDaniel AS, Stall JN, Hovelson DH, Cani AK, Liu CJ, Tomlins SA, et al. Next-Generation Sequencing of Tubal Intraepithelial Carcinomas. *JAMA Oncol* 2015.
11. Grasso C, Butler T, Rhodes K, Quist M, Neff TL, Moore S, et al. Assessing copy number alterations in targeted, amplicon-based next-generation sequencing data. *J Mol Diagn* 2015;17(1):53-63.
12. Robinson DR, Wu YM, Vats P, Su F, Lonigro RJ, Cao X, et al. Activating ESR1 mutations in hormone-resistant metastatic breast cancer. *Nat Genet* 2013;45(12):1446-51.
13. Li H, Handsaker B, Wysoker A, Fennell T, Ruan J, Homer N, et al. The Sequence Alignment/Map format and SAMtools. *Bioinformatics* 2009;25(16):2078-9.
14. Koboldt DC, Zhang Q, Larson DE, Shen D, McLellan MD, Lin L, et al. VarScan 2: somatic mutation and copy number alteration discovery in cancer by exome sequencing. *Genome Res* 2012;22(3):568-76.
15. Wang K, Li M, Hakonarson H. ANNOVAR: functional annotation of genetic variants from high-throughput sequencing data. *Nucleic Acids Res* 2010;38(16):e164.
16. Lonigro RJ, Grasso CS, Robinson DR, Jing X, Wu YM, Cao X, et al. Detection of somatic copy number alterations in cancer using targeted exome capture sequencing. *Neoplasia* 2011;13(11):1019-25.

17. Beaver JA, Jelovac D, Balukrishna S, Cochran RL, Croessmann S, Zabransky DJ, et al. Detection of cancer DNA in plasma of patients with early-stage breast cancer. *Clin Cancer Res* 2014;20(10):2643-50.
18. Johnson MD, Zuo H, Lee KH, Trebley JP, Rae JM, Weatherman RV, et al. Pharmacological characterization of 4-hydroxy-N-desmethyl tamoxifen, a novel active metabolite of tamoxifen. *Breast Cancer Res Treat* 2004;85(2):151-9.

**Supplementary Figures and Tables**

# Supplementary Figure S1

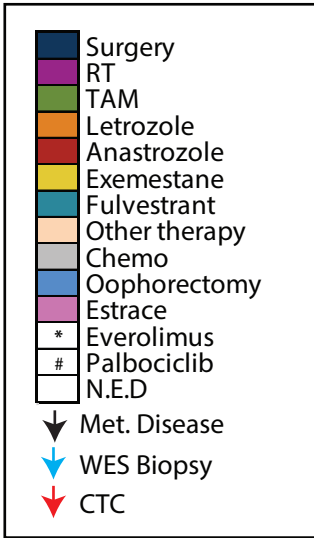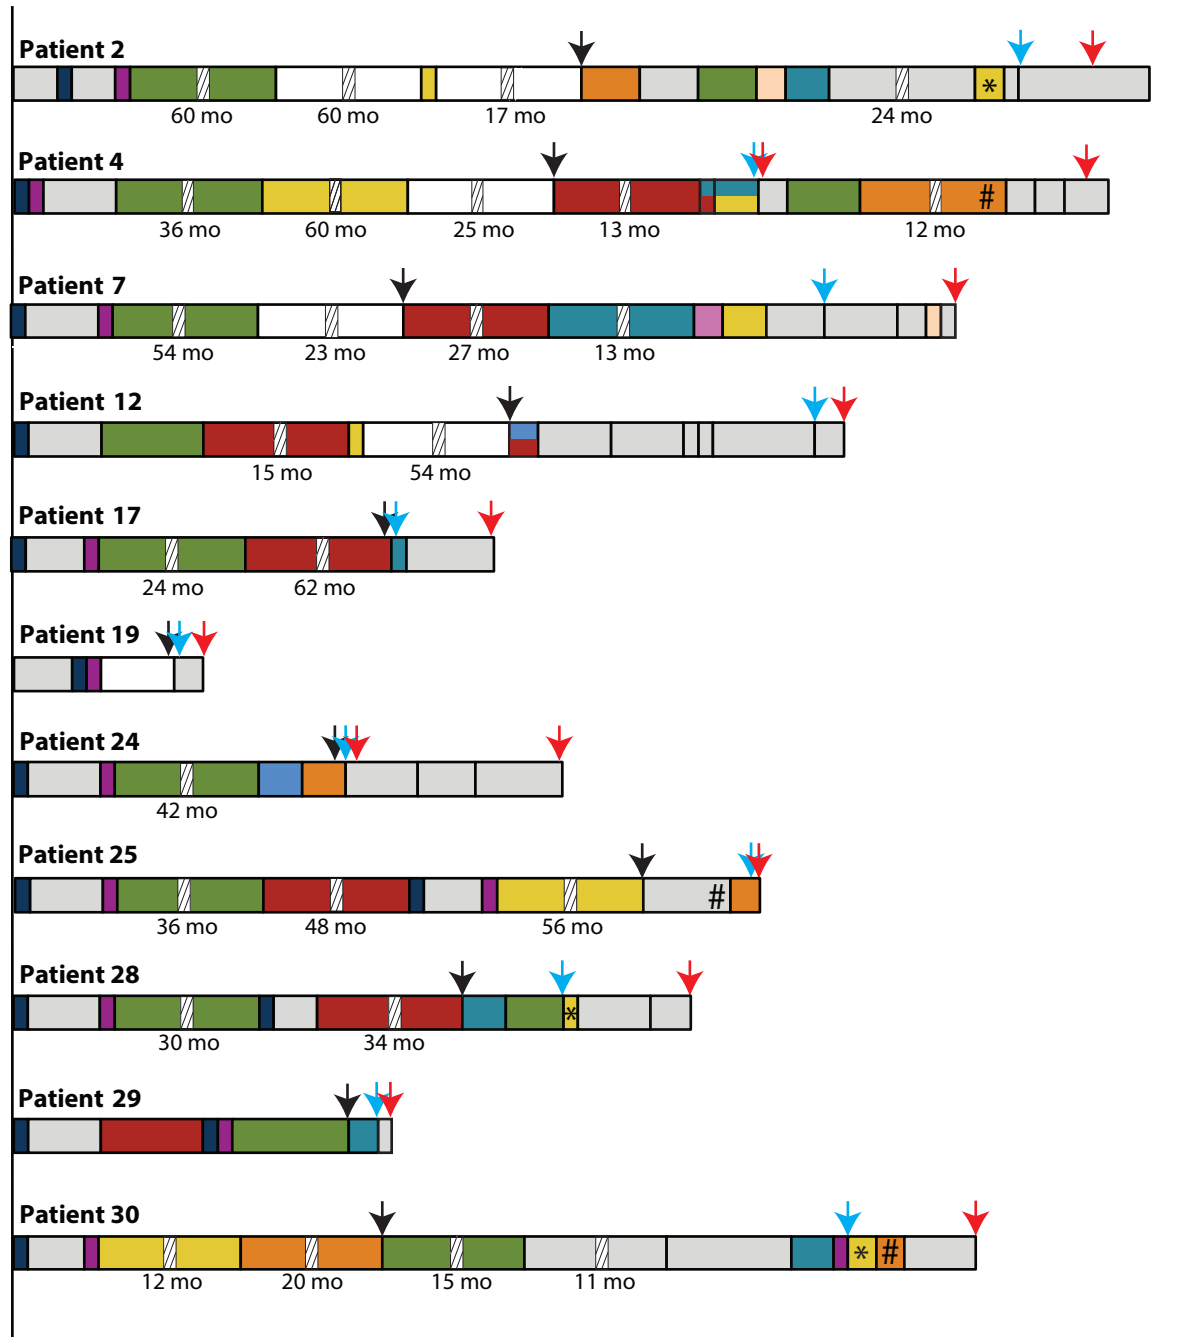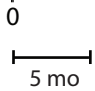

# Supplementary Figure S2

A.

Patient 02

**CDH1 Q641X**

chr16:68856113 C>T GGACCATT CAG TACAAC

V.F. 0.0

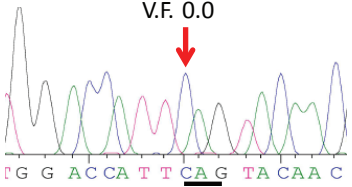

V.F. 1.0

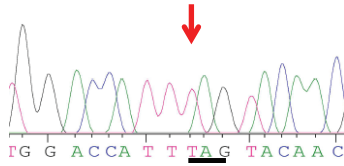

V.F. 1.0

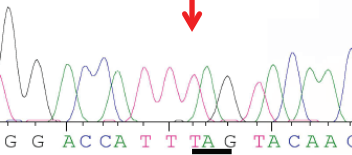

V.F. 1.0

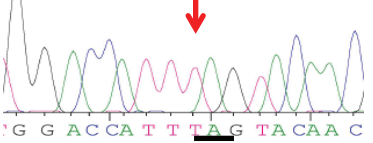

V.F. 1.0

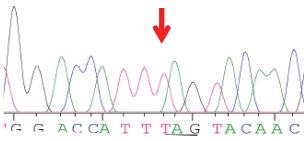

V.F. 0.0

No amplification

V.F. 1.0

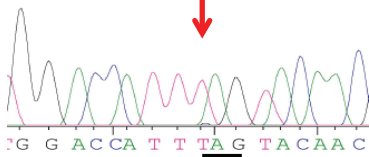

V.F. 1.0

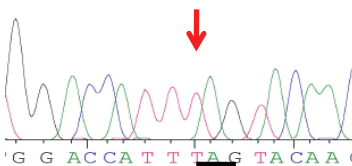

**ESR1 Y537S (& D538G)**

chr6:152419923 A>C GCCCCTC TAT GAC CTGC

V.F. 0.0, 0.0

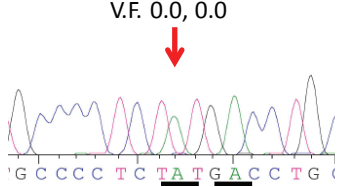

V.F. 0.47, 0.0

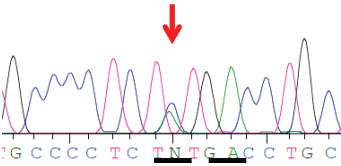

V.F. 0.52, 0.0

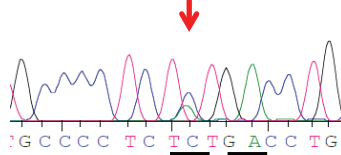

V.F. 0.0, 0.0

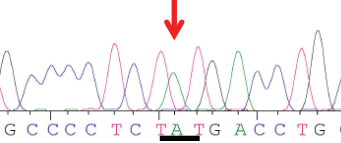

V.F. 0.34, 0.0

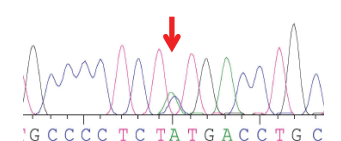

V.F. 0.46, 0.0

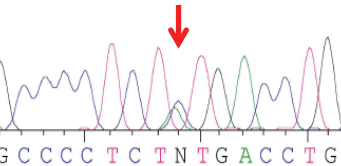

V.F. 0.0, 0.0

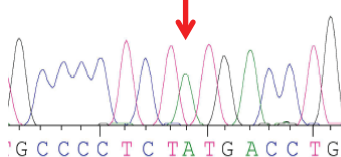

V.F. 0.65, 0.0

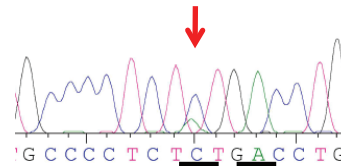

**ESR1 A569S**

chr6:152420018 G>T GCCACTTG GCC ACTGCG

V.F. 0.0

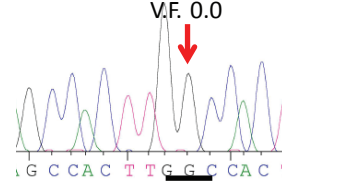

V.F. 0.0

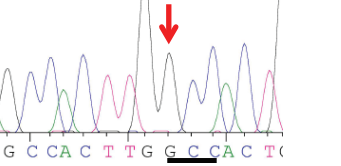

V.F. 0.0

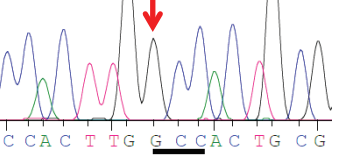

V.F. 0.56

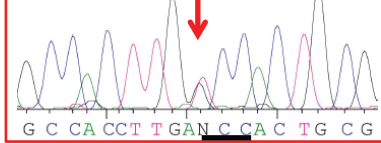

V.F. 0.0

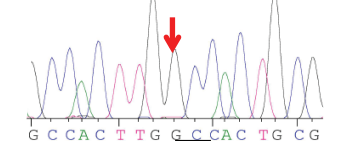

V.F. 0.0

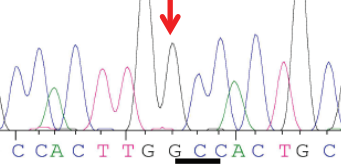

V.F. 0.0

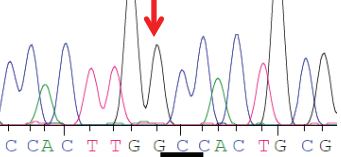

V.F. 0.0

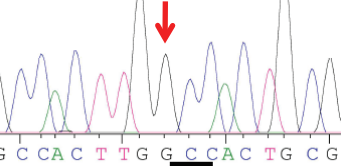

**Patient 17**

**BRCA2 Q1931X**

chr13:32914283 C>T TTTTA CAA CA

No amplification

Pt17 A5 CTC

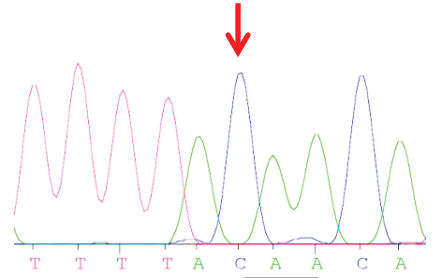

Pt17\_A6\_CTC

V.F. 0.10

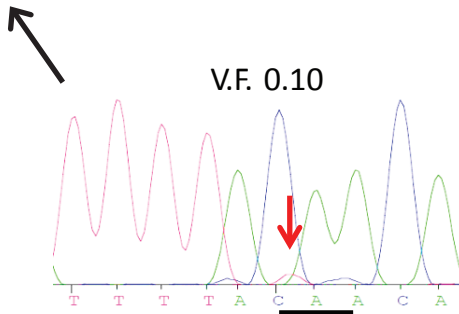

Pt17(4P)\_CTC\_Pool  
A5\_A6\_A7\_A8

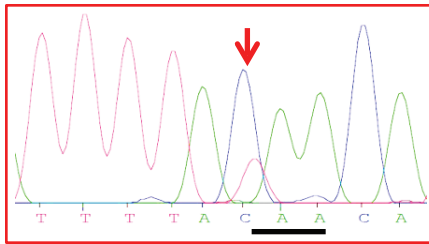

Pt17\_A7\_CTC

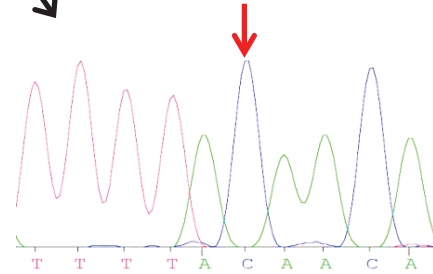

Pt17\_A8\_CTC

V.F. 0.0

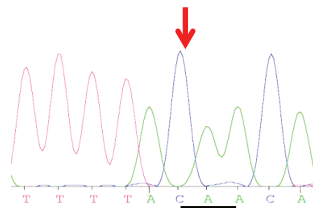

Pt17\_WBC\_Pool

**B.**

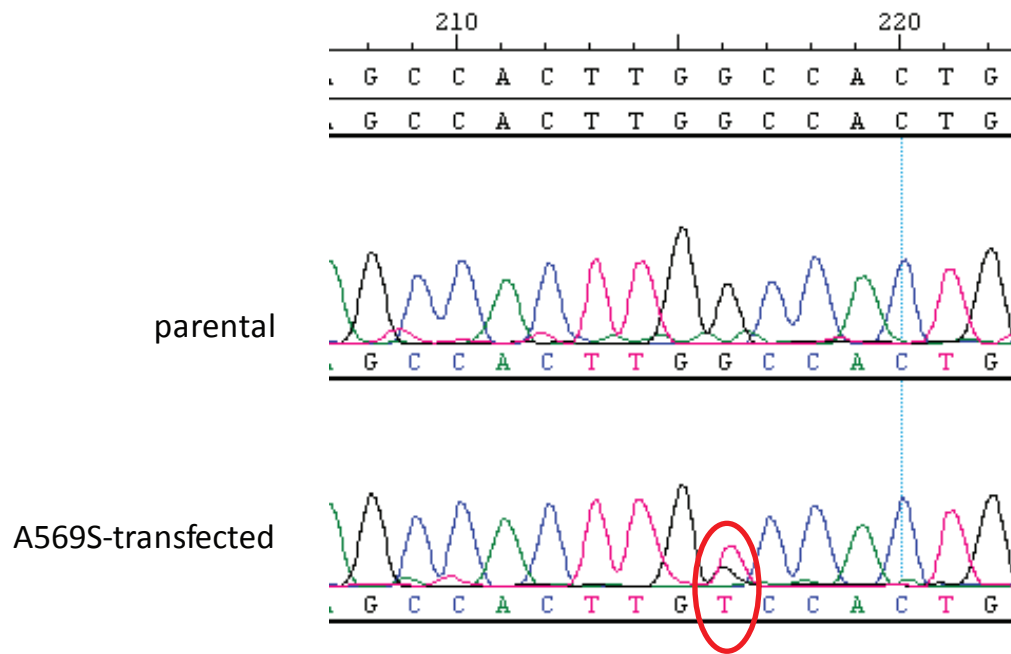

**C.**

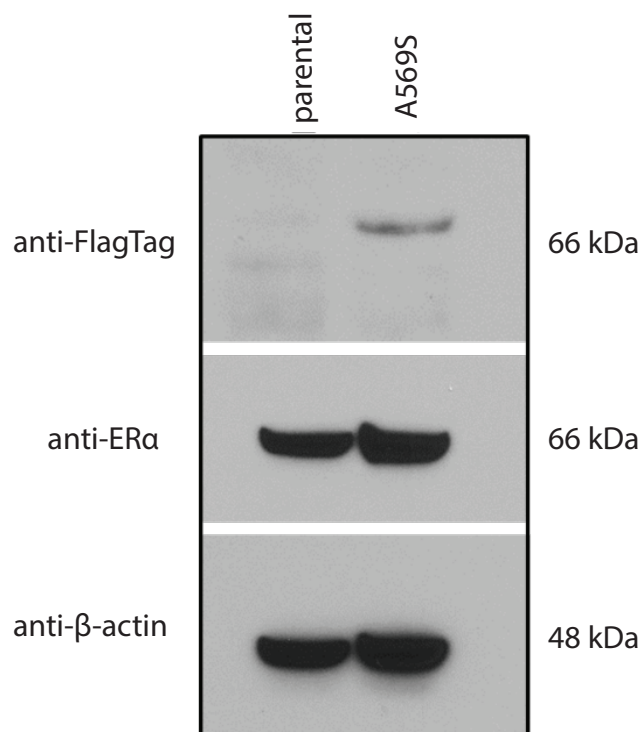

# Supplementary Figure S3

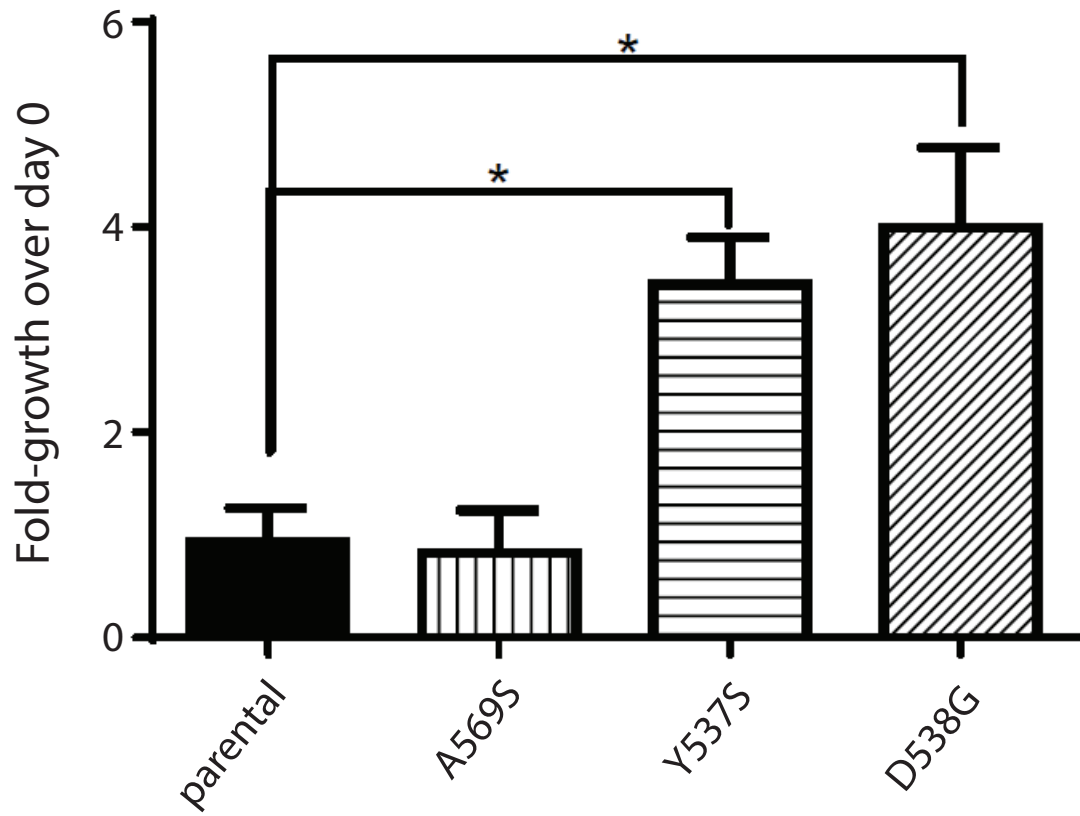



# Supplementary Figure S4

A

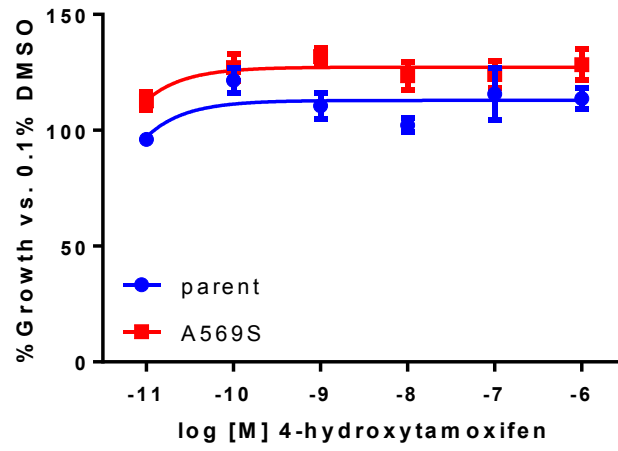

B

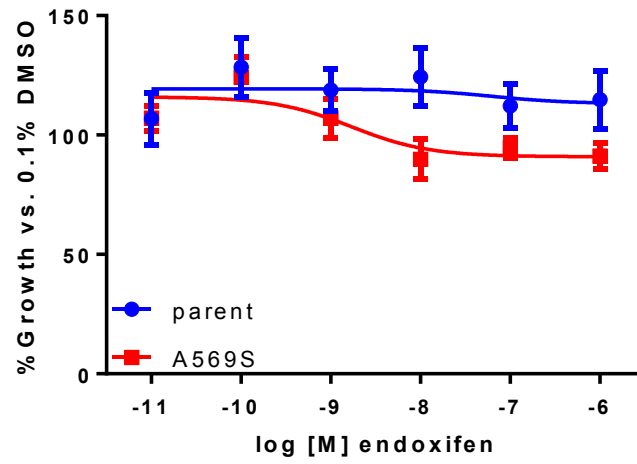

# Supplementary Figure S5

A

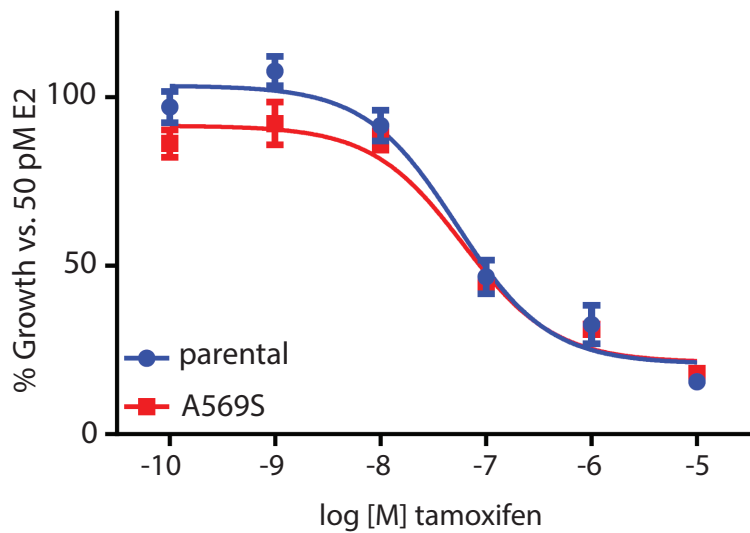

B

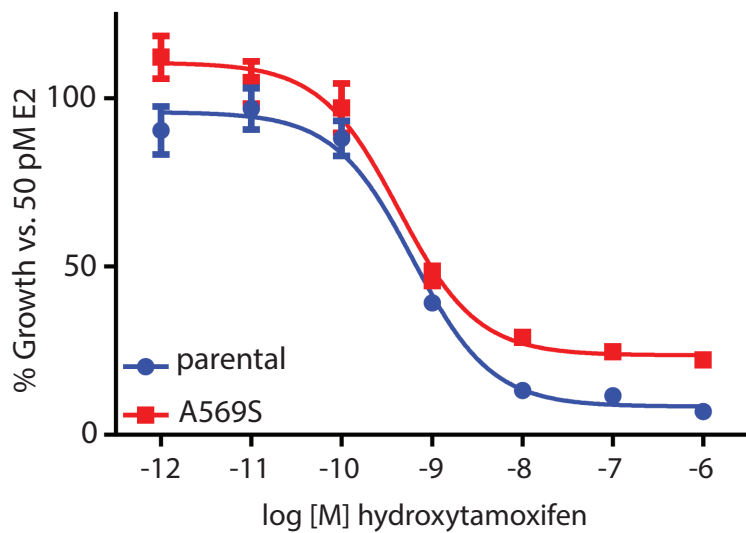

C

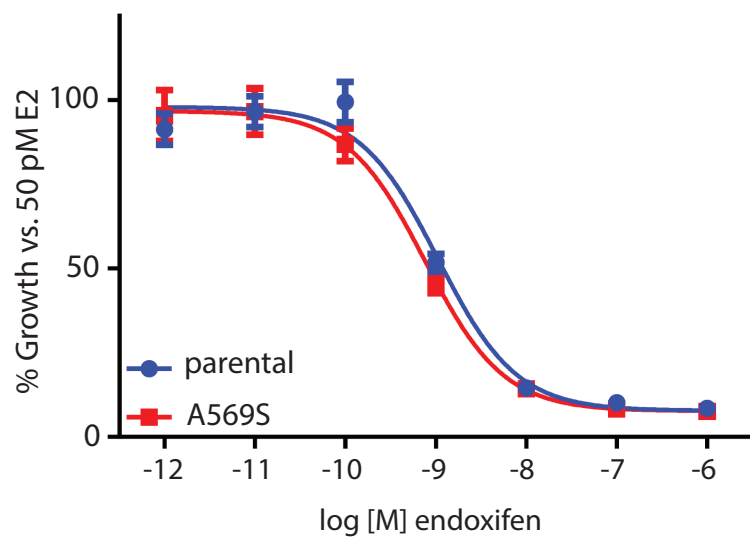

D

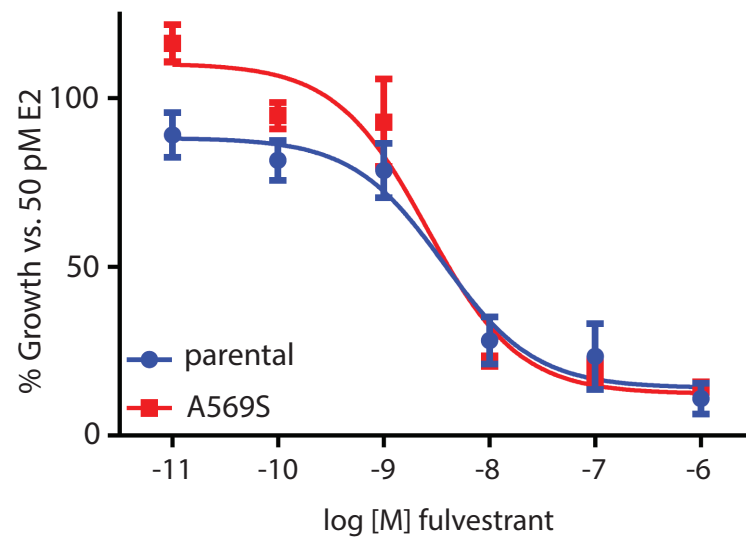

**Supplementary Table S1. Oncomine Comprehensive Panel (OCP) target genes by presence of the MseI restriction site**

|                                  |                                                                                                                                                                                                                                                                                                                                                                                                                                                                                                                                                                                                                                           |
|----------------------------------|-------------------------------------------------------------------------------------------------------------------------------------------------------------------------------------------------------------------------------------------------------------------------------------------------------------------------------------------------------------------------------------------------------------------------------------------------------------------------------------------------------------------------------------------------------------------------------------------------------------------------------------------|
| <b>Unaffected Genes</b>          | <i>ARAF, BTK, FOXL2, GNA11, IDH2, IFITM1, IFITM3, KNSTRN, MAP2K2, MAPK1, MLH1, MPL, RHOA, STAT3, HNF1A, HRAS, JAK1, MAX, PPP2R1A, SRC, CSF1R, ESR1, MED12, NKX2 -8, NRAS, SMO</i>                                                                                                                                                                                                                                                                                                                                                                                                                                                         |
| <b>Partially Affected Genes</b>  | <i>ABL1, ACVRL1, AKT1, ALK, APC, APEX1, AR, ATM, ATP11B, BAP1, BCL2L1, BCL9, BIRC2, BIRC3, BRAF, BRCA1, BRCA2, CBL, CCND1, CCNE1, CD274, CD44, CDH1, CDK4, CDK6, CDKN2A, CSNK2A1, CTNNB1, DCUN1D1, DDR2, DNMT3A, EGFR, ERBB2, ERBB3, ERBB4, FBXW7, FGFR1, FGFR2, FGFR3, FGFR4, FLT3, GAS6, GATA2, GATA3, GNAS, IDH1, IGF1R, IL6, JAK3, KDR, KIT, KRAS, MAP2K1, MCL1, MDM2, MDM4, MET, MSH2, MTOR, MYC, MYCL, MYCN, MYD88, MYO18A, NF1, NF2, NKX2 -1, NOTCH1, PDCD1LG2, PDGFRA, PIK3CA, PIK3R1, PNP, PPARG, PTCH1, PTEN, PTPN11, RB1, RET, RPS6KB1, SMAD4, SMARCB1, SOX2, STK11, TERT, TET2, TIAF1, TP53, TSC1, TSC2, VHL, WT1, ZNF217</i> |
| <b>Completely Affected Genes</b> | <i>CHEK2, EZH2, GNAQ, JAK2, MAGOH, NFE2L2, NPM1, PAX5, RAC1, RAF1, RHEB, SF3B1, SPOP, U2AF1, XPO1</i>                                                                                                                                                                                                                                                                                                                                                                                                                                                                                                                                     |

Genes included in the Oncomine Comprehensive Panel (OCP) divided in three categories based on the presence of the MseI restriction site in at least one amplicon.

**Supplementary Table S2. NGS of BT-474 cells spiked into blood and purified identifies known *TP53* mutation**

| Cartridge Number | Number of CTC<br>Single (S)<br>Pooled (P) | Elapsed time between CellSearch® and DEPArray | Storage condition | Genome integrity index (GII) | <i>TP53</i> (p.E285K)<br>Variant frequency |
|------------------|-------------------------------------------|-----------------------------------------------|-------------------|------------------------------|--------------------------------------------|
| 1                | 1 (S)                                     | 3 days                                        | 4°C               | 4                            | 1                                          |
|                  | 1 (S)                                     | 3 days                                        |                   | 4                            | 0.8                                        |
|                  | 1 (S)                                     | 3 days                                        |                   | 4                            | 1                                          |
| 2                | 1 (S)                                     | 6 months                                      | 4°C               | 3                            | 1                                          |
|                  | 1 (S)                                     | 6 months                                      |                   | 2                            | 1                                          |
|                  | 1 (S)                                     | 6 months                                      |                   | 3                            | 1                                          |
|                  | 9 (P)                                     | 6 months                                      |                   | 3                            | 1                                          |
| 3                | 1 (S)                                     | 2 years                                       | RT                | 1                            | *                                          |
|                  | 1 (S)                                     | 2 years                                       |                   | 1                            | *                                          |

NGS of CellSearch®-enriched and DEPArray™-purified spiked in cells from the BT-474 breast cancer cell line with the CHPv2 panel. Number of cells per sample, storage time and conditions, DNA quality (4=high) and the detected variant frequency of the expected mutation are shown. RT= room temperature; \* Low library quality and uniformity of coverage over the target regions

**Supplementary Table S3. Results of CTC purification by DEPArray**

| Patient #   | Timepoint | CTC Enumeration | Unassigned events | Processed by CellSearch | Processed by DEPArray | Time Between Assays (Days) | DEPArray High Quality CTC | DEPArray Low Quality CTC | DEPArray Total CTC | # of single cells sequenced | #of cells sequenced as pool(s) | Sequenced | % of purified CTC | % of high quality CTC/purified CTC | % of high quality CTC/total CTC |
|-------------|-----------|-----------------|-------------------|-------------------------|-----------------------|----------------------------|---------------------------|--------------------------|--------------------|-----------------------------|--------------------------------|-----------|-------------------|------------------------------------|---------------------------------|
| CTC-002 A   | BL        | 78              | 63                | 1/22/2014               | 12/18/2014            | 330                        | 14                        | 4                        | 18                 | 7                           | 6                              | Yes       | 23%               | 78%                                | 18%                             |
| CTC-002 B   | BL        | 57              | 40                | 1/22/2014               | 4/28/2016             | 827                        | 10                        | 12                       | 22                 | 10                          | 12                             | Yes       | 39%               | 45%                                | 18%                             |
| CTC-002 C   | BL        | 57              | 61                | 1/22/2014               | 4/28/2016             | 827                        | 9                         | 13                       | 22                 | 10                          | 10                             | Yes       | 39%               | 41%                                | 16%                             |
| CTC-003     | BL        | 6               | 55                | 1/23/2014               | 6/12/2015             | 505                        | 0                         | 2                        | 2                  | 0                           | 0                              | No        | 33%               | 0%                                 | 0%                              |
| CTC-007 A   | BL        | 15              | 1311              | 2/21/2014               | 4/15/2015             | 418                        | 1                         | 2                        | 3                  | 0                           | 3                              | Yes       | 20%               | 33%                                | 7%                              |
| CTC-007 B   | BL        | 18              | 1513              | 2/20/2014               | 12/22/2014            | 305                        | 2                         | 5                        | 7                  | 1                           | 1                              | Yes       | 39%               | 29%                                | 11%                             |
| CTC-008 A   | BL        | 40              | 379               | 2/21/2014               | 3/31/2015             | 403                        | 2                         | 16                       | 18                 | 0                           | 3                              | Yes       | 45%               | 11%                                | 5%                              |
| CTC-008 B   | BL        | 41              | 361               | 2/21/2014               | 12/22/2014            | 304                        | 0                         | 17                       | 17                 | 0                           | 0                              | No        | 41%               | 0%                                 | 0%                              |
| CTC-009     | BL        | 12              | 68                | 2/24/2014               | 4/14/2015             | 414                        | 0                         | 10                       | 10                 | 1                           | 0                              | Yes       | 83%               | 0%                                 | 0%                              |
| CTC-010     | BL        | 14              | 147               | 2/26/2014               | 4/14/2015             | 412                        | 0                         | 16                       | 16                 | 0                           | 0                              | No        | 114%              | 0%                                 | 0%                              |
| CTC-012     | BL        | 13              | 31                | 3/12/2014               | 4/2/2015              | 386                        | 1                         | 5                        | 6                  | 1                           | 0                              | Yes       | 46%               | 17%                                | 8%                              |
| CTC-014     | BL        | 16              | 45                | 4/17/2014               | 1/5/2015              | 263                        | 8                         | 1                        | 9                  | 0                           | 3                              | Yes       | 56%               | 89%                                | 50%                             |
| CTC-015     | BL        | 5               | 39                | 5/2/2014                | 6/12/2015             | 406                        | 0                         | 0                        | 0                  | 0                           | 0                              | No        | 0%                | 0%                                 | 0%                              |
| CTC-017     | BL        | 21              | 242               | 7/16/2014               | 4/1/2015              | 259                        | 4                         | 16                       | 20                 | 0                           | 4                              | Yes       | 95%               | 20%                                | 19%                             |
| CTC-019 A   | BL        | 317             | 6250              | 7/16/2014               | 12/29/2014            | 166                        | 1                         | 6                        | 7                  | 0                           | 3                              | Yes       | 2%                | 14%                                | 0%                              |
| CTC-019 B   | BL        | 344             | 5404              | 7/16/2014               | 3/30/2015             | 257                        | 2                         | 14                       | 16                 | 0                           | 3                              | Yes       | 5%                | 13%                                | 1%                              |
| CTC-024     | BL        | 275             | 71                | 11/11/2014              | 12/18/2014            | 37                         | 14                        | 8                        | 22                 | 0                           | 13                             | Yes       | 8%                | 64%                                | 5%                              |
| CTC-025     | BL        | 8               | 75                | 7/14/2015               | 4/5/2016              | 266                        | 5                         | 8                        | 13                 | 5                           | 5                              | Yes       | 163%              | 38%                                | 63%                             |
| CTC-028*    | BL        | 142             | 329               | 9/25/2015               | 4/5/2016              | 193                        | 3                         | 13                       | 16                 | 2                           | 2                              | Yes       | 23%               | 19%                                | 2%                              |
| CTC-029*    | BL        | 81              | 58                | 10/9/2015               | 4/5/2016              | 179                        | 15                        | 1                        | 16                 | 4                           | 8                              | Yes       | 40%               | 94%                                | 19%                             |
| CTC-030*    | BL        | 962             | 441               | 10/7/2015               | 5/23/2016             | 229                        | 34                        | 0                        | 34                 | 5                           | 4                              | Yes       | 7%                | 100%                               | 4%                              |
| CTC-004     | P         | 9               | 38                | 12/16/2015              | 4/5/2016              | 111                        | 6                         | 7                        | 13                 | 3                           | 3                              | Yes       | 144%              | 46%                                | 67%                             |
| CTC-024*    | P         | 126             | 291               | 2/19/2016               | 5/23/2016             | 94                         | 5                         | 5                        | 10                 | 2                           | 3                              | Yes       | 16%               | 50%                                | 4%                              |
| <b>Mean</b> |           |                 |                   |                         |                       |                            |                           |                          |                    |                             |                                |           | <b>47%</b>        | <b>35%</b>                         | <b>14%</b>                      |

CellSearch®-enriched cells were purified into individual cells by DEPArray™. Patient # and CellSearch® cartridge (by letter) are shown in left-most column. CTC enumeration, processing dates, DNA quality and sequencing status are shown. BL = baseline; P = progression; \*For these samples, only 1/2 cartridge was purified by DEPArray, % of purified CTC was adjusted accordingly

**Supplementary Table S4: Mean CTC Next Generation Sequencing parameters**

| <b>Mapped Reads</b> | <b>Reads On Target</b> | <b>Mean Sequencing Depth</b> | <b>Sequencing Uniformity</b> | <b>Variants</b> |
|---------------------|------------------------|------------------------------|------------------------------|-----------------|
| 3,683,759           | 96.93%                 | 1,508                        | 41.05%                       | 151             |

Mean sequencing parameters for 91 samples including mapped reads (total number of targeted reads per sample), reads on target (percentage of total reads that map to regions targeted by the sequencing panel), mean sequencing depth (mean number of reads covering each targeted base), sequencing uniformity (percentage of targeted bases that have at least 0.2X of the mean sequencing depth), variants (total number of sequencing variants detected per sample by the somatic low stringency setting).

Supplementary Table S5. NGS-identified prioritized mutations in individual and pooled CTC samples

| SAMPLE           | Gene | Location       | REFERENCE | ALTERNATE | Aminoacid | RefSeq    | Exonic Function  | Vartaiont Fraction | Varaint Reads | Total Reads |
|------------------|------|----------------|-----------|-----------|-----------|-----------|------------------|--------------------|---------------|-------------|
| PI02 5P R1-R7 C  | CDH1 | chr16:68856113 | C         | T         | p.Q641X   | NM_004360 | stopgainSNV      | 1.00               | 246           | 246         |
| PI02 5P R9-R18 C | CDH1 | chr16:68856113 | C         | T         | p.Q641X   | NM_004360 | stopgainSNV      | 0.71               | 550           | 771         |
| PI02 6P A3-D5 A  | CDH1 | chr16:68856113 | C         | T         | p.Q641X   | NM_004360 | stopgainSNV      | 1.00               | 1995          | 1995        |
| PI02 6P R1-R6 B  | CDH1 | chr16:68856113 | C         | T         | p.Q641X   | NM_004360 | stopgainSNV      | 0.93               | 569           | 611         |
| PI02 6P R7-R20 B | CDH1 | chr16:68856113 | C         | T         | p.Q641X   | NM_004360 | stopgainSNV      | 1.00               | 21            | 21          |
| PI02 7P 3b A     | CDH1 | chr16:68856113 | C         | T         | p.Q641X   | NM_004360 | stopgainSNV      | 1.00               | 1652          | 1652        |
| PI02 A12 A       | CDH1 | chr16:68856113 | C         | T         | p.Q641X   | NM_004360 | stopgainSNV      | 1.00               | 1997          | 1997        |
| PI02 A9 A        | CDH1 | chr16:68856113 | C         | T         | p.Q641X   | NM_004360 | stopgainSNV      | 1.00               | 1993          | 1993        |
| PI02 D1 A        | CDH1 | chr16:68856113 | C         | T         | p.Q641X   | NM_004360 | stopgainSNV      | 1.00               | 1993          | 1993        |
| PI02 D3 A        | CDH1 | chr16:68856113 | C         | T         | p.Q641X   | NM_004360 | stopgainSNV      | 1.00               | 1994          | 1994        |
| PI02 D6 A        | CDH1 | chr16:68856113 | C         | T         | p.Q641X   | NM_004360 | stopgainSNV      | 1.00               | 1996          | 1996        |
| PI02 R1 C        | CDH1 | chr16:68856113 | C         | T         | p.Q641X   | NM_004360 | stopgainSNV      | 1.00               | 441           | 441         |
| PI02 R11 B       | CDH1 | chr16:68856113 | C         | T         | p.Q641X   | NM_004360 | stopgainSNV      | 1.00               | 12            | 12          |
| PI02 R11 C       | CDH1 | chr16:68856113 | C         | T         | p.Q641X   | NM_004360 | stopgainSNV      | 0.52               | 438           | 846         |
| PI02 R12 C       | CDH1 | chr16:68856113 | C         | T         | p.Q641X   | NM_004360 | stopgainSNV      | 1.00               | 1676          | 1676        |
| PI02 R13 B       | CDH1 | chr16:68856113 | C         | T         | p.Q641X   | NM_004360 | stopgainSNV      | 1.00               | 120           | 120         |
| PI02 R14 B       | CDH1 | chr16:68856113 | C         | T         | p.Q641X   | NM_004360 | stopgainSNV      | 1.00               | 37            | 37          |
| PI02 R2 B        | CDH1 | chr16:68856113 | C         | T         | p.Q641X   | NM_004360 | stopgainSNV      | 1.00               | 262           | 262         |
| PI02 R3 B        | CDH1 | chr16:68856113 | C         | T         | p.Q641X   | NM_004360 | stopgainSNV      | 1.00               | 1584          | 1584        |
| PI02 R7 B        | CDH1 | chr16:68856113 | C         | T         | p.Q641X   | NM_004360 | stopgainSNV      | 0.91               | 21            | 23          |
| PI02 R3 C        | CDH1 | chr16:68856113 | C         | T         | p.Q641X   | NM_004360 | stopgainSNV      | 1.00               | 489           | 489         |
| PI02 R9 C        | CDH1 | chr16:68856113 | C         | T         | p.Q641X   | NM_004360 | stopgainSNV      | 1.00               | 116           | 116         |
| PI02 R17 B       | CDH1 | chr16:68863698 | G         | T         | p.E813X   | NM_004360 | stopgainSNV      | 0.83               | 149           | 180         |
| PI02 5P R1-R7 C  | CDH1 | chr16:68835618 | C         | T         | p.S70F    | NM_004360 | nonsynonymousSNV | 1.00               | 1980          | 1980        |
| PI02 5P R9-R18 C | CDH1 | chr16:68835618 | C         | T         | p.S70F    | NM_004360 | nonsynonymousSNV | 0.44               | 867           | 1976        |
| PI02 6P A3-D5 A  | CDH1 | chr16:68835618 | C         | T         | p.S70F    | NM_004360 | nonsynonymousSNV | 0.98               | 1964          | 1997        |
| PI02 6P R1-R6 B  | CDH1 | chr16:68835618 | C         | T         | p.S70F    | NM_004360 | nonsynonymousSNV | 0.33               | 665           | 1997        |
| PI02 6P R7-R20 B | CDH1 | chr16:68835618 | C         | T         | p.S70F    | NM_004360 | nonsynonymousSNV | 1.00               | 1990          | 1990        |
| PI02 7P 3b A     | CDH1 | chr16:68835618 | C         | T         | p.S70F    | NM_004360 | nonsynonymousSNV | 0.99               | 1981          | 1998        |
| PI02 A12 A       | CDH1 | chr16:68835618 | C         | T         | p.S70F    | NM_004360 | nonsynonymousSNV | 1.00               | 1990          | 1990        |
| PI02 D1 A        | CDH1 | chr16:68835618 | C         | T         | p.S70F    | NM_004360 | nonsynonymousSNV | 1.00               | 1991          | 1991        |
| PI02 D2 A        | CDH1 | chr16:68835618 | C         | T         | p.S70F    | NM_004360 | nonsynonymousSNV | 1.00               | 1989          | 1989        |
| PI02 D3 A        | CDH1 | chr16:68835618 | C         | T         | p.S70F    | NM_004360 | nonsynonymousSNV | 1.00               | 1990          | 1990        |
| PI02 D6 A        | CDH1 | chr16:68835618 | C         | T         | p.S70F    | NM_004360 | nonsynonymousSNV | 1.00               | 1989          | 1989        |
| PI02 R1 B        | CDH1 | chr16:68835618 | C         | T         | p.S70F    | NM_004360 | nonsynonymousSNV | 1.00               | 1984          | 1984        |
| PI02 R11 B       | CDH1 | chr16:68835618 | C         | T         | p.S70F    | NM_004360 | nonsynonymousSNV | 1.00               | 1980          | 1980        |
| PI02 R11 C       | CDH1 | chr16:68835618 | C         | T         | p.S70F    | NM_004360 | nonsynonymousSNV | 0.52               | 1029          | 1986        |
| PI02 R12 C       | CDH1 | chr16:68835618 | C         | T         | p.S70F    | NM_004360 | nonsynonymousSNV | 1.00               | 1983          | 1983        |
| PI02 R13 B       | CDH1 | chr16:68835618 | C         | T         | p.S70F    | NM_004360 | nonsynonymousSNV | 1.00               | 1981          | 1981        |
| PI02 R14 B       | CDH1 | chr16:68835618 | C         | T         | p.S70F    | NM_004360 | nonsynonymousSNV | 1.00               | 1991          | 1991        |
| PI02 R2 B        | CDH1 | chr16:68835618 | C         | T         | p.S70F    | NM_004360 | nonsynonymousSNV | 1.00               | 1974          | 1974        |
| PI02 R20 B       | CDH1 | chr16:68835618 | C         | T         | p.S70F    | NM_004360 | nonsynonymousSNV | 1.00               | 1989          | 1989        |
| PI02 R3 C        | CDH1 | chr16:68835618 | C         | T         | p.S70F    | NM_004360 | nonsynonymousSNV | 1.00               | 1980          | 1980        |
| PI02 R4 C        | CDH1 | chr16:68835618 | C         | T         | p.S70F    | NM_004360 | nonsynonymousSNV | 1.00               | 1989          | 1989        |
| PI02 R5 B        | CDH1 | chr16:68835618 | C         | T         | p.S70F    | NM_004360 | nonsynonymousSNV | 1.00               | 1977          | 1977        |
| PI02 R6 C        | CDH1 | chr16:68835618 | C         | T         | p.S70F    | NM_004360 | nonsynonymousSNV | 1.00               | 1981          | 1981        |
| PI02 R7 B        | CDH1 | chr16:68835618 | C         | T         | p.S70F    | NM_004360 | nonsynonymousSNV | 1.00               | 1985          | 1985        |
| PI02 R7 C        | CDH1 | chr16:68835618 | C         | T         | p.S70F    | NM_004360 | nonsynonymousSNV | 1.00               | 1976          | 1976        |
| PI02 R9 C        | CDH1 | chr16:68835618 | C         | T         | p.S70F    | NM_004360 | nonsynonymousSNV | 1.00               | 1991          | 1991        |
| PI02 R18 C       | CDH1 | chr16:68835618 | C         | T         | p.S70F    | NM_004360 | nonsynonymousSNV | 0.79               | 11            | 14          |
| PI02 A12 A       | ESR1 | chr6:152420018 | G         | T         | p.A569S   | NM_000125 | nonsynonymousSNV | 0.56               | 1117          | 1994        |
| PI02 5P R1-R7 C  | ESR1 | chr6:152419923 | A         | C         | p.Y537S   | NM_000125 | nonsynonymousSNV | 0.41               | 819           | 1998        |
| PI02 5P R9-R18 C | ESR1 | chr6:152419923 | A         | C         | p.Y537S   | NM_000125 | nonsynonymousSNV | 0.40               | 797           | 2000        |
| PI02 6P A3-D5 A  | ESR1 | chr6:152419923 | A         | C         | p.Y537S   | NM_000125 | nonsynonymousSNV | 0.35               | 693           | 1997        |
| PI02 6P R1-R6 B  | ESR1 | chr6:152419923 | A         | C         | p.Y537S   | NM_000125 | nonsynonymousSNV | 0.15               | 299           | 2000        |
| PI02 6P R7-R20 B | ESR1 | chr6:152419923 | A         | C         | p.Y537S   | NM_000125 | nonsynonymousSNV | 0.46               | 911           | 1998        |
| PI02 7P 3b A     | ESR1 | chr6:152419923 | A         | C         | p.Y537S   | NM_000125 | nonsynonymousSNV | 0.47               | 947           | 1997        |
| PI02 A9 A        | ESR1 | chr6:152419923 | A         | C         | p.Y537S   | NM_000125 | nonsynonymousSNV | 0.52               | 1046          | 1995        |
| PI02 D1 A        | ESR1 | chr6:152419923 | A         | C         | p.Y537S   | NM_000125 | nonsynonymousSNV | 0.34               | 676           | 1998        |
| PI02 D2 A        | ESR1 | chr6:152419923 | A         | C         | p.Y537S   | NM_000125 | nonsynonymousSNV | 0.46               | 920           | 1995        |

| SAMPLE      | Gene   | Location        | REFERENCE      | ALTERNATE | Aminoacid    | RefSeq       | Exonic Function    | Variant Fraction | Variant Reads | Total Reads |
|-------------|--------|-----------------|----------------|-----------|--------------|--------------|--------------------|------------------|---------------|-------------|
| Pt02 D6 A   | ESR1   | chr6:152419923  | A              | C         | p.Y537S      | NM_000125    | nonsynonymousSNV   | 0.65             | 1288          | 1994        |
| Pt02 R1 B   | ESR1   | chr6:152419923  | A              | C         | p.Y537S      | NM_000125    | nonsynonymousSNV   | 1.00             | 715           | 715         |
| Pt02 R1 C   | ESR1   | chr6:152419923  | A              | C         | p.Y537S      | NM_000125    | nonsynonymousSNV   | 0.37             | 730           | 1999        |
| Pt02 R11 B  | ESR1   | chr6:152419923  | A              | C         | p.Y537S      | NM_000125    | nonsynonymousSNV   | 0.10             | 631           | 5645        |
| Pt02 R11 C  | ESR1   | chr6:152419923  | A              | C         | p.Y537S      | NM_000125    | nonsynonymousSNV   | 0.49             | 988           | 1999        |
| Pt02 R12 C  | ESR1   | chr6:152419923  | A              | C         | p.Y537S      | NM_000125    | nonsynonymousSNV   | 0.48             | 956           | 2000        |
| Pt02 R13 B  | ESR1   | chr6:152419923  | A              | C         | p.Y537S      | NM_000125    | nonsynonymousSNV   | 0.68             | 1357          | 1999        |
| Pt02 R14 B  | ESR1   | chr6:152419923  | A              | C         | p.Y537S      | NM_000125    | nonsynonymousSNV   | 0.52             | 1030          | 2000        |
| Pt02 R17 B  | ESR1   | chr6:152419923  | A              | C         | p.Y537S      | NM_000125    | nonsynonymousSNV   | 1.00             | 1961          | 1961        |
| Pt02 R2 B   | ESR1   | chr6:152419923  | A              | C         | p.Y537S      | NM_000125    | nonsynonymousSNV   | 1.00             | 2000          | 2000        |
| Pt02 R20 B  | ESR1   | chr6:152419923  | A              | C         | p.Y537S      | NM_000125    | nonsynonymousSNV   | 0.51             | 1021          | 2000        |
| Pt02 R3 C   | ESR1   | chr6:152419923  | A              | C         | p.Y537S      | NM_000125    | nonsynonymousSNV   | 0.87             | 965           | 1110        |
| Pt02 R4 C   | ESR1   | chr6:152419923  | A              | C         | p.Y537S      | NM_000125    | nonsynonymousSNV   | 0.45             | 909           | 1999        |
| Pt02 R6 C   | ESR1   | chr6:152419923  | A              | C         | p.Y537S      | NM_000125    | nonsynonymousSNV   | 0.31             | 623           | 1996        |
| Pt02 R7 C   | ESR1   | chr6:152419923  | A              | C         | p.Y537S      | NM_000125    | nonsynonymousSNV   | 0.39             | 782           | 2000        |
| Pt02 R9 C   | ESR1   | chr6:152419923  | A              | C         | p.Y537S      | NM_000125    | nonsynonymousSNV   | 1.00             | 1998          | 1998        |
| Pt02 R18 C  | ESR1   | chr6:152419923  | A              | C         | p.Y537S      | NM_000125    | nonsynonymousSNV   | 0.83             | 10            | 12          |
| Pt04 (3P)   | PIK3CA | chr3:178936091  | G              | A         | p.E545K      | NM_006218    | nonsynonymousSNV   | 0.53             | 190           | 361         |
| Pt04 R3     | PIK3CA | chr3:178936091  | G              | A         | p.E545K      | NM_006218    | nonsynonymousSNV   | 1.00             | 1138          | 1996        |
| Pt04 (3P)   | TP53   | chr17:7577506   | C              | G         | p.D259H      | NM_000546    | nonsynonymousSNV   | 0.43             | 857           | 1821        |
| Pt04 R3     | TP53   | chr17:7577506   | C              | G         | p.D259H      | NM_000546    | nonsynonymousSNV   | 1.00             | 1986          | 1138        |
| Pt04 (3P)   | TP53   | chr17:7577099   | C              | G         | p.R280T      | NM_000546    | nonsynonymousSNV   | 0.16             | 292           | 1986        |
| Pt04 R3     | TP53   | chr17:7577099   | C              | G         | p.R280T      | NM_000546    | nonsynonymousSNV   | 0.65             | 1294          | 1998        |
| Pt12 A9     | PIK3CA | chr3:178952085  | A              | G         | p.H1047R     | NM_006218    | nonsynonymousSNV   | 0.85             | 1703          | 1997        |
| Pt12 A9     | TP53   | chr17:7577538   | C              | T         | p.R248Q      | NM_000546    | nonsynonymousSNV   | 0.73             | 1457          | 1999        |
| Pt14 (3P)   | HNF1A  | chr12:121431414 | G              | T         | p.W206C      | NM_000545    | nonsynonymousSNV   | 0.17             | 270           | 1569        |
| Pt17 (4P)   | BRCA2  | chr13:32914283  | C              | T         | p.Q1931X     | NM_000059    | stopgainSNV        | 0.10             | 88            | 878         |
| Pt19 (3P)   | PTCH1  | chr9:98211431   | C              | A         | p.E1242X     | NM_000264    | stopgainSNV        | 0.28             | 390           | 1378        |
| Pt24B (4P2) | CDH1   | chr16:68867274  | G              | T         | p.E841X      | NM_004360    | stopgainSNV        | 0.14             | 135           | 952         |
| Pt24 R2     | CDH1   | chr16:68855944  | TC             | T         | p.I584fs     | NM_004360    | frameshiftdeletion | 1.00             | 1007          | 1007        |
| Pt24 R3     | CDH1   | chr16:68855944  | TC             | T         | p.I584fs     | NM_004360    | frameshiftdeletion | 1.00             | 1978          | 1978        |
| Pt24B (4P1) | CDH1   | chr16:68855944  | C              | -         | p.I584fs     | NM_004360    | frameshiftdeletion | 0.69             | 1361          | 1986        |
| Pt24B (4P2) | CDH1   | chr16:68855944  | C              | -         | p.I584fs     | NM_004360    | frameshiftdeletion | 0.77             | 1536          | 1992        |
| Pt24B (5P)  | CDH1   | chr16:68855944  | C              | -         | p.I584fs     | NM_004360    | frameshiftdeletion | 0.79             | 1568          | 1977        |
| Pt24P (3P)  | CDH1   | chr16:68855944  | TC             | T         | p.I584fs     | NM_004360    | frameshiftdeletion | 0.45             | 749           | 1648        |
| Pt24B (4P2) | NOTCH1 | chr9:139390716  | G              | T         | p.S2492X     | NM_017617    | stopgainSNV        | 0.18             | 350           | 1998        |
| Pt24 R2     | TP53   | chr17:7578464   | CGGGTGCCGGGCGG | C         | p.152_156del | NM_000546    | frameshiftdeletion | 1.00             | 1971          | 1971        |
| Pt24 R3     | TP53   | chr17:7578464   | CGGGTGCCGGGCGG | C         | p.152_156del | NM_000546    | frameshiftdeletion | 0.98             | 1932          | 1971        |
| Pt24B (4P1) | TP53   | chr17:7578464   | GGGTGCCGGGCGG  | -         | p.152_156del | NM_000546    | frameshiftdeletion | 0.30             | 578           | 1938        |
| Pt24B (4P2) | TP53   | chr17:7578464   | GGGTGCCGGGCGG  | -         | p.152_156del | NM_000546    | frameshiftdeletion | 0.88             | 1702          | 1941        |
| Pt24B (5P)  | TP53   | chr17:7578464   | GGGTGCCGGGCGG  | -         | p.152_156del | NM_000546    | frameshiftdeletion | 0.94             | 1831          | 1952        |
| Pt24P (3P)  | TP53   | chr17:7578464   | CGGGTGCCGGGCGG | C         | p.152_156del | NM_000546    | frameshiftdeletion | 0.51             | 1003          | 1958        |
| Pt24B (4P2) | TP53   | chr17:7578203   | C              | A         | p.V216L      | NM_000546    | nonsynonymousSNV   | 0.36             | 286           | 784         |
| Pt24B (5P)  | TET2   | chr4:106196820  | G              | T         | p.V1718L     | NM_001127208 | nonsynonymousSNV   | 0.90             | 1207          | 1334        |
| Pt24B (4P1) | TET2   | chr4:106196820  | G              | T         | p.V1718L     | NM_001127208 | nonsynonymousSNV   | 0.53             | 1303          | 2449        |
| Pt24B (4P2) | TET2   | chr4:106196820  | G              | T         | p.V1718L     | NM_001127208 | nonsynonymousSNV   | 0.70             | 346           | 497         |
| Pt25 R4     | TP53   | chr17:7578395   | T              | C         | p.H179R      | NM_000546    | nonsynonymousSNV   | 0.99             | 3084          | 3113        |
| Pt25 (3P)   | TP53   | chr17:7578395   | T              | C         | p.H179R      | NM_000546    | nonsynonymousSNV   | 0.61             | 1057          | 1723        |
| Pt28 (2P)   | TP53   | chr17:7577547   | C              | A         | p.G245V      | NM_000546    | nonsynonymousSNV   | 1.00             | 1987          | 1987        |
| Pt28 R3     | PIK3CA | chr3:178936083  | G              | A         | p.E542K      | NM_006218    | nonsynonymousSNV   | 0.20             | 86            | 437         |
| Pt28 (2P)   | PIK3CA | chr3:178936083  | G              | A         | p.E542K      | NM_006218    | nonsynonymousSNV   | 0.55             | 296           | 539         |
| Pt28 R3     | TP53   | chr17:7577547   | C              | A         | p.G245V      | NM_000546    | nonsynonymousSNV   | 1.00             | 1987          | 1987        |
| Pt30 R1     | PIK3CA | chr3:178952085  | A              | G         | p.H1047R     | NM_006218    | nonsynonymousSNV   | 0.52             | 330           | 636         |
| Pt30 R2     | PIK3CA | chr3:178952085  | A              | G         | p.H1047R     | NM_006218    | nonsynonymousSNV   | 0.37             | 212           | 567         |
| Pt30 R3     | PIK3CA | chr3:178952085  | A              | G         | p.H1047R     | NM_006218    | nonsynonymousSNV   | 0.54             | 360           | 661         |
| Pt30 R5     | PIK3CA | chr3:178952085  | A              | G         | p.H1047R     | NM_006218    | nonsynonymousSNV   | 0.65             | 589           | 900         |
| Pt30 R10    | PIK3CA | chr3:178952085  | A              | G         | p.H1047R     | NM_006218    | nonsynonymousSNV   | 0.49             | 311           | 635         |
| Pt30 (4P)   | PIK3CA | chr3:178952085  | A              | G         | p.H1047R     | NM_006218    | nonsynonymousSNV   | 0.48             | 260           | 536         |
| Pt30 R1     | ESR1   | chr6:152419926  | A              | G         | p.D538G      | NM_000125    | nonsynonymousSNV   | 1.00             | 2829          | 2843        |
| Pt30 R2     | ESR1   | chr6:152419926  | A              | G         | p.D538G      | NM_000125    | nonsynonymousSNV   | 0.29             | 1050          | 3634        |
| Pt30 R3     | ESR1   | chr6:152419926  | A              | G         | p.D538G      | NM_000125    | nonsynonymousSNV   | 1.00             | 2589          | 2599        |
| Pt30 R5     | ESR1   | chr6:152419926  | A              | G         | p.D538G      | NM_000125    | nonsynonymousSNV   | 1.00             | 3137          | 3151        |
| Pt30 (4P)   | ESR1   | chr6:152419926  | A              | G         | p.D538G      | NM_000125    | nonsynonymousSNV   | 1.00             | 2550          | 2562        |

All high confidence, non-synonymous variants identified in CTC samples are shown. For each variant, the gene, location (hg19), reference and variant (Alternate) alleles, amino acid (AA) change, RefSeq ID, variant type, variant read frequency (flow corrected variant over total reads) and flow-corrected variant and total reads separately are shown. See supplementary methods for variant filtering and prioritization. Each variant location was visually checked in IGV (Integrated Genome Viewer) in all samples from each patient who harbored at least one sample with that variant in order to confirm adequate coverage and



## Supplementary Table S6. 2 x 2 contingency concordance tables for alterations in CTC vs tissue

### A. CTC vs. tissue mutation concordance

|     |       | Tissue |   |       |     |
|-----|-------|--------|---|-------|-----|
|     |       | Y      | N | Total |     |
| CTC | Y     | 14     | 9 | 23    | 61% |
|     | N     | 9      | 0 | 9     |     |
|     | Total | 23     | 9 | 32    |     |
|     |       | 61%    |   |       |     |

### B. CTC vs. tissue CNA concordance

|     |       | Tissue |    |       |     |
|-----|-------|--------|----|-------|-----|
|     |       | Y      | N  | Total |     |
| CTC | Y     | 19     | 12 | 31    | 61% |
|     | N     | 7      | 0  | 7     |     |
|     | Total | 26     | 12 | 38    |     |
|     |       | 73%    |    |       |     |

Legend: Cohort-wide numbers of alterations for **A.** Mutations and **B.** Copy number alterations (CNA) that were detected by either method, showing numbers and percentages of alterations concordant in either direction. Y= Yes (detected), N= No (not detected)

**Supplementary Table S7. Patient #2 analysis of primary, clinical metastatic tissue, research biopsy, pt-DNA by ddPCR**

| Time of sampling | Initial Diagnosis |     | 1st clin. met. 2009 |     | Later metastasis    |             | Later metastasis |               |             |     |
|------------------|-------------------|-----|---------------------|-----|---------------------|-------------|------------------|---------------|-------------|-----|
| Date             | 7/1/97            |     | 7/1/09              |     | 7/19/13             |             | 1/24/14          |               |             |     |
| Site             | Breast Primary    |     | Omental             |     | Pleural effusion    |             | Blood            |               |             |     |
| Type of specimen | FFPE              |     | FFPE                |     | cytospin            |             | CTC              |               | cfDNA       |     |
| Assay            | ddPCR             | WES | ddPCR               | WES | ddPCR               | WES         | Targeted NGS     | Sanger        | ddPCR       | WES |
| <i>ESR1</i>      |                   |     |                     |     |                     |             |                  |               |             |     |
| <b>Y537S</b>     | WT                |     | mut (45%)           |     | mut (45%)           | mut (44.5%) | mut 26 /32 (81%) | mut 4/6 (67%) | mut (0.87%) |     |
| <b>D538G</b>     | mut (0.01%)       |     | mut (0.01%)         |     | mut (0.02%)         | WT          | mut 0/32 (0%)    | mut 0/6 (0%)  | mut (0.01%) |     |
| <b>A569S</b>     | WT                |     | WT (fewdroplets+**) |     | WT (fewdroplets+**) | WT          | mut 1/32 (3%)    | mut 1/6 (17%) | WT          |     |

For each timepoint, specimen type and detection technique, presence/absence (and variant frequency) are shown for all three ESR1 mutations. FFPE = Formalin-Fixed Paraffin-Embedded; ddPCR = droplet digital PCR; WES = whole exome sequencing; mut = mutation present; WT = Wild Type; \*\*a few droplets mutated for specific mutation, but below the predetermined threshold. Shaded area = assay not performed.

With this approach, we detected, albeit at extremely low levels, an ESR1 p.D538G hotspot mutation that was absent from both CTC and tissue by the respective NGS techniques applied. ddPCR droplets carrying this mutation were present at VF 0.0001 – 0.0002 (0.01 – 0.02%) but consistently appeared in the primary tumor, two consecutive metastases, and later in plasma derived cfDNA collected concurrently with CTC. In concordance with CTC and tissue profiling, ddPCR of tissues and cfDNA detected the ESR1 p.Y537S mutation only in post-ET specimens. Interestingly, the novel ESR1 p.A569S mutation detected in one CTC was also only present in a few droplets, but below the predetermined detection threshold [Chu, Clin Cancer Res 2016; Beaver, Clin Cancer Res 2014] in post-ET specimens.

**Supplementary Table S8. Primer/probe sequences used in Sanger sequencing and ddPCR**

| <b>Pre-amplification Primers Sequences</b> | <b>Forward</b>                         | <b>Reverse</b>            |
|--------------------------------------------|----------------------------------------|---------------------------|
| <i>ESRI</i> Y537S/D538G                    | TCCCAGCTCCCATCCTAAAGTG                 | CACTGCGGGCTCTACTTCAT      |
| <i>ESRI</i> A569S                          | TGCTGCTGGAGATGCTGGAC                   | CCTCCCCCGTGATGTAATACT     |
| <b>ddPCR Primers Sequences</b>             |                                        |                           |
|                                            | <b>Forward</b>                         | <b>Reverse</b>            |
| <i>ESRI</i> Y537S/D538G                    | GCATGAAGTGCAAGAACGTG                   | AGACGGACCAAAGCCACTT       |
| <i>ESRI</i> A569S                          | TACATGCGCCCACTAGCCGT                   | GCAAGGAATGCGATGAAGTA      |
| <b>ddPCR Probes Sequences</b>              |                                        |                           |
|                                            | <b>Mutant</b>                          | <b>Wild type</b>          |
| <i>ESRI</i> Y537S                          | TCT <sup>e</sup> TGACCTGCTGCTGGAGATGCT | TCTATGACCTGCTGCTGGAGATGCT |
| <i>ESRI</i> D538G                          | TCTATG <sup>g</sup> CCTGCTGCTGGAGATGCT | TCTATGACCTGCTGCTGGAGATGCT |
| <i>ESRI</i> A569S                          | ACCAAAGCCACTT <sup>i</sup> CCACTGCGG   | ACCAAAGCCACTTGCCACTGCGG   |
